# Supplementary material for: Interleukin-22 Deficiency Contributes to Dextran Sulfate Sodium-Induced Inflammation in Japanese Medaka, Oryzias latipes
Source: PubMed Central journal article supplement (PMC8573258; doi:10.3389/fimmu.2021.688036), 2021-10-25
Supplement: DataSheet_1.pdf [file DataSheet_1.pdf]

# Supplementary materials

## Article information

### **Interleukin-22 deficiency contributes to the dextran sulfate sodium (DSS)-induced inflammation in Japanese medaka, *Oryzias latipes***

Yoshie Takahashi<sup>1,†</sup>, Yo Okamura<sup>2,†</sup>, Nanaki Harada<sup>1</sup>, Mika Watanabe<sup>3</sup>, Hiroshi Miyanishi<sup>4</sup>, Tomoya Kono<sup>3</sup>, Masahiro Sakai<sup>3</sup>, Jun-ichi Hikima<sup>3\*</sup>

<sup>1</sup> International Course of Agriculture, Graduate School of Agriculture, University of Miyazaki, 1-1 Gakuenkibanadai-nishi, Miyazaki 889-2192, Japan

<sup>2</sup> Interdisciplinary Graduate School of Agriculture and Engineering, University of Miyazaki, 1-1 Gakuenkibanadai-nishi, Miyazaki 889-2192, Japan

<sup>3</sup> Department of Biochemistry and Applied Biosciences, Faculty of Agriculture, University of Miyazaki, 1-1 Gakuenkibanadai-nishi, Miyazaki 889-2192, Japan

<sup>4</sup> Department of Marine Biology and Environmental Science, Faculty of Agriculture, University of Miyazaki, 1-1 Gakuenkibanadai-nishi, Miyazaki 889-2192, Japan

† **These authors contributed equally to this work.**

\* **Correspondence to:** Jun-ichi Hikima, Ph.D. (e-mail: [jhikima@cc.miyazaki-u.ac.jp](mailto:jhikima@cc.miyazaki-u.ac.jp))

#### **Contents:**

**Fig. S1.** Multiple alignments of the deduced protein sequences of IL-22 (A), IL-22RA1 (B), and IL-22BP (C) in Japanese medaka and other vertebrates.

**Fig. S2.** 3D structures of IL-22 (A), IL-22RA1 (B), and IL-22BP (C) in human, yellow catfish, and medaka predicted using SWISS-MODEL.

**Fig. S3.** Schematic representation of synteny for *il22* (A), *il22ra1* (B), and *il22bp* (C) in various species.

**Fig. S4.** Negative control (sense probe) of *in situ* hybridization (ISH) in medaka *il22* and *il22bp* mRNA localization.

**Fig. S5.** crRNA regions, mutated sequences, and mutation efficiency of medaka *il22*.

**Fig. S6.** Morphological comparison of WT and IL-22-KO medaka (-4).

**Fig. S7.** Gene expression analyses of *il22* (A), *il22ra1* (B), and *il22bp* (C) in WT and KO medaka.

**Fig. S8.** Histological analysis of dextran sulfate sodium (DSS)-induced inflammation in WT and IL-22-KO medaka larvae.

**Fig. S9.** The PI3K-Akt signaling pathway maps of differentially expression gene (DEG) hits determined using data from the Kyoto Encyclopedia of Genes and Genomes (KEGG) database.

**Fig. S10.** MAPK signaling pathway maps of differentially expressed gene (DEG) hits determined using data from the Kyoto Encyclopedia of Genes and Genomes (KEGG) database.

**Fig. S11.** Real-time PCR (qPCR) analysis of inflammatory cytokines and multiple genes related to the PI3K-Akt and MAPK signaling pathways.

**Fig. S12.** Complement cascade maps of differentially expressed gene (DEG) hits determined using data from the Kyoto Encyclopedia of Genes and Genomes (KEGG) database.

**Fig. S13.** Real-time PCR (qPCR) analysis of *fgf7* and *muc2* in the anterior and posterior intestines of adult medaka.

\* **Tables S1-S5** are separately shown in the Excel files as “Supplementary tables”.

A

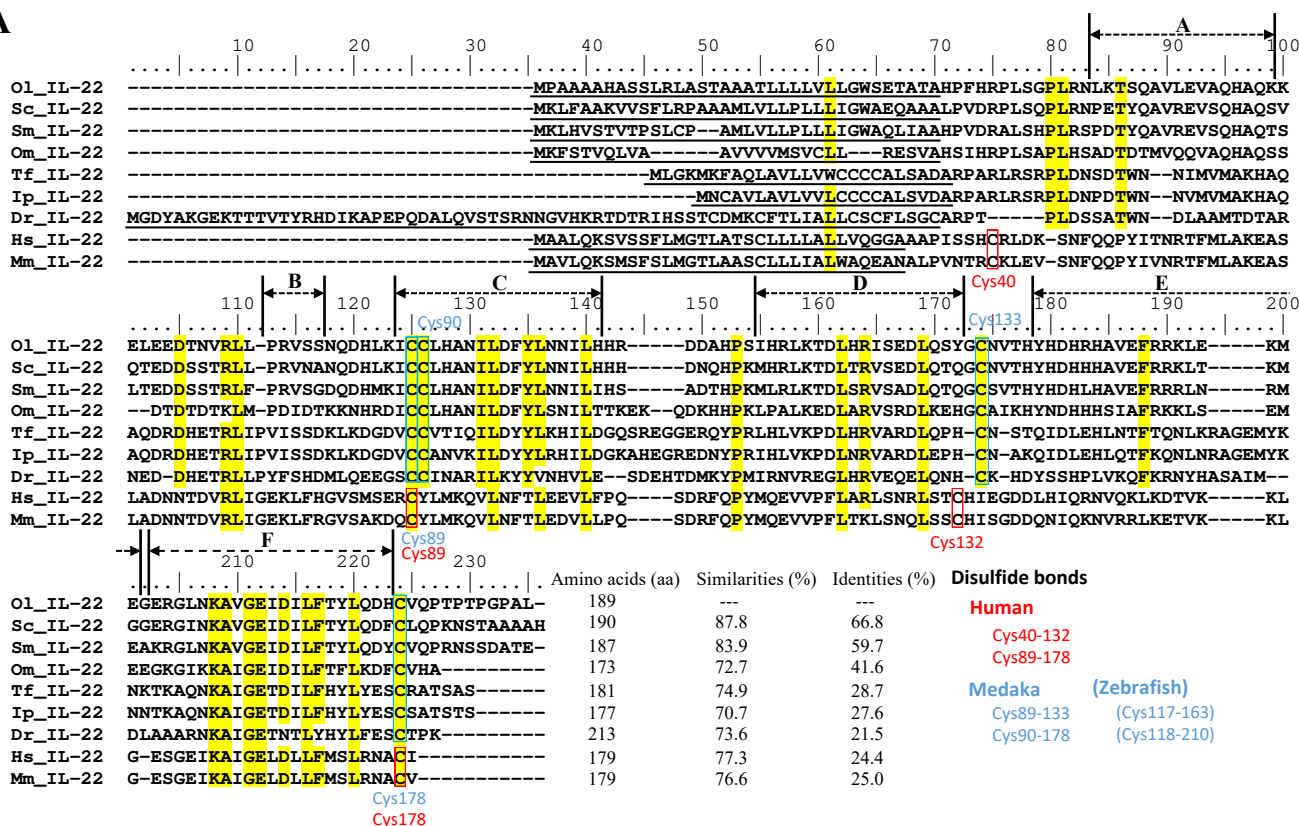

**Fig. S1.** Multiple alignments of the deduced protein sequences of IL-22 (A), IL-22RA1 (B), and IL-22BP (C) in Japanese medaka and other vertebrates. Identities and similarities of each IL-22, IL-22RA1, and IL-22BP protein with Japanese medaka IL-22, IL-22RA1, and IL-22BP peptide, indicated on the right side of the alignment. The amino acid residues highlighted in yellow represent matches of more than 75% among the aligned species. The letters (A to F) in the alignment of IL-22 show each range of alpha helix structures. Cysteine residues forming disulfide bonds are surrounded by red boxes (mammal) and blue boxes (teleost). In IL-22RA1 and IL-22BP, the ranges of functional domains (FNIII) and transmembrane regions predicted using SMART7 are shown by arrows. The species for the sequences used in these alignments are as follows; *Oryzias latipes* (Ol), *Siniperca chuatsi* (Sc), *Scophthalmus maximus* (Sm), *Oncorhynchus mykiss* (Om), *Tachysurus fulvidraco* (Tf), *Ictalurus punctatus* (Ip), *Danio rerio* (Dr), *Takifugu rubripes* (Tr), *Cynoglossus joyneri* (Cj), *Salmo salar* (Ss), *Esox lucius* (El), *Astyanax mexicanus* (Am), *Tachysurus fulvidraco* (Tf), *Cyprinus carpio* (Cc), *Homo sapiens* (Hs), and *Mus musculus* (Mm). Full names, abbreviations, and GenBank accession numbers of the sequences shown in this alignment are listed in **Table S2**.

Fig. S1. B

B

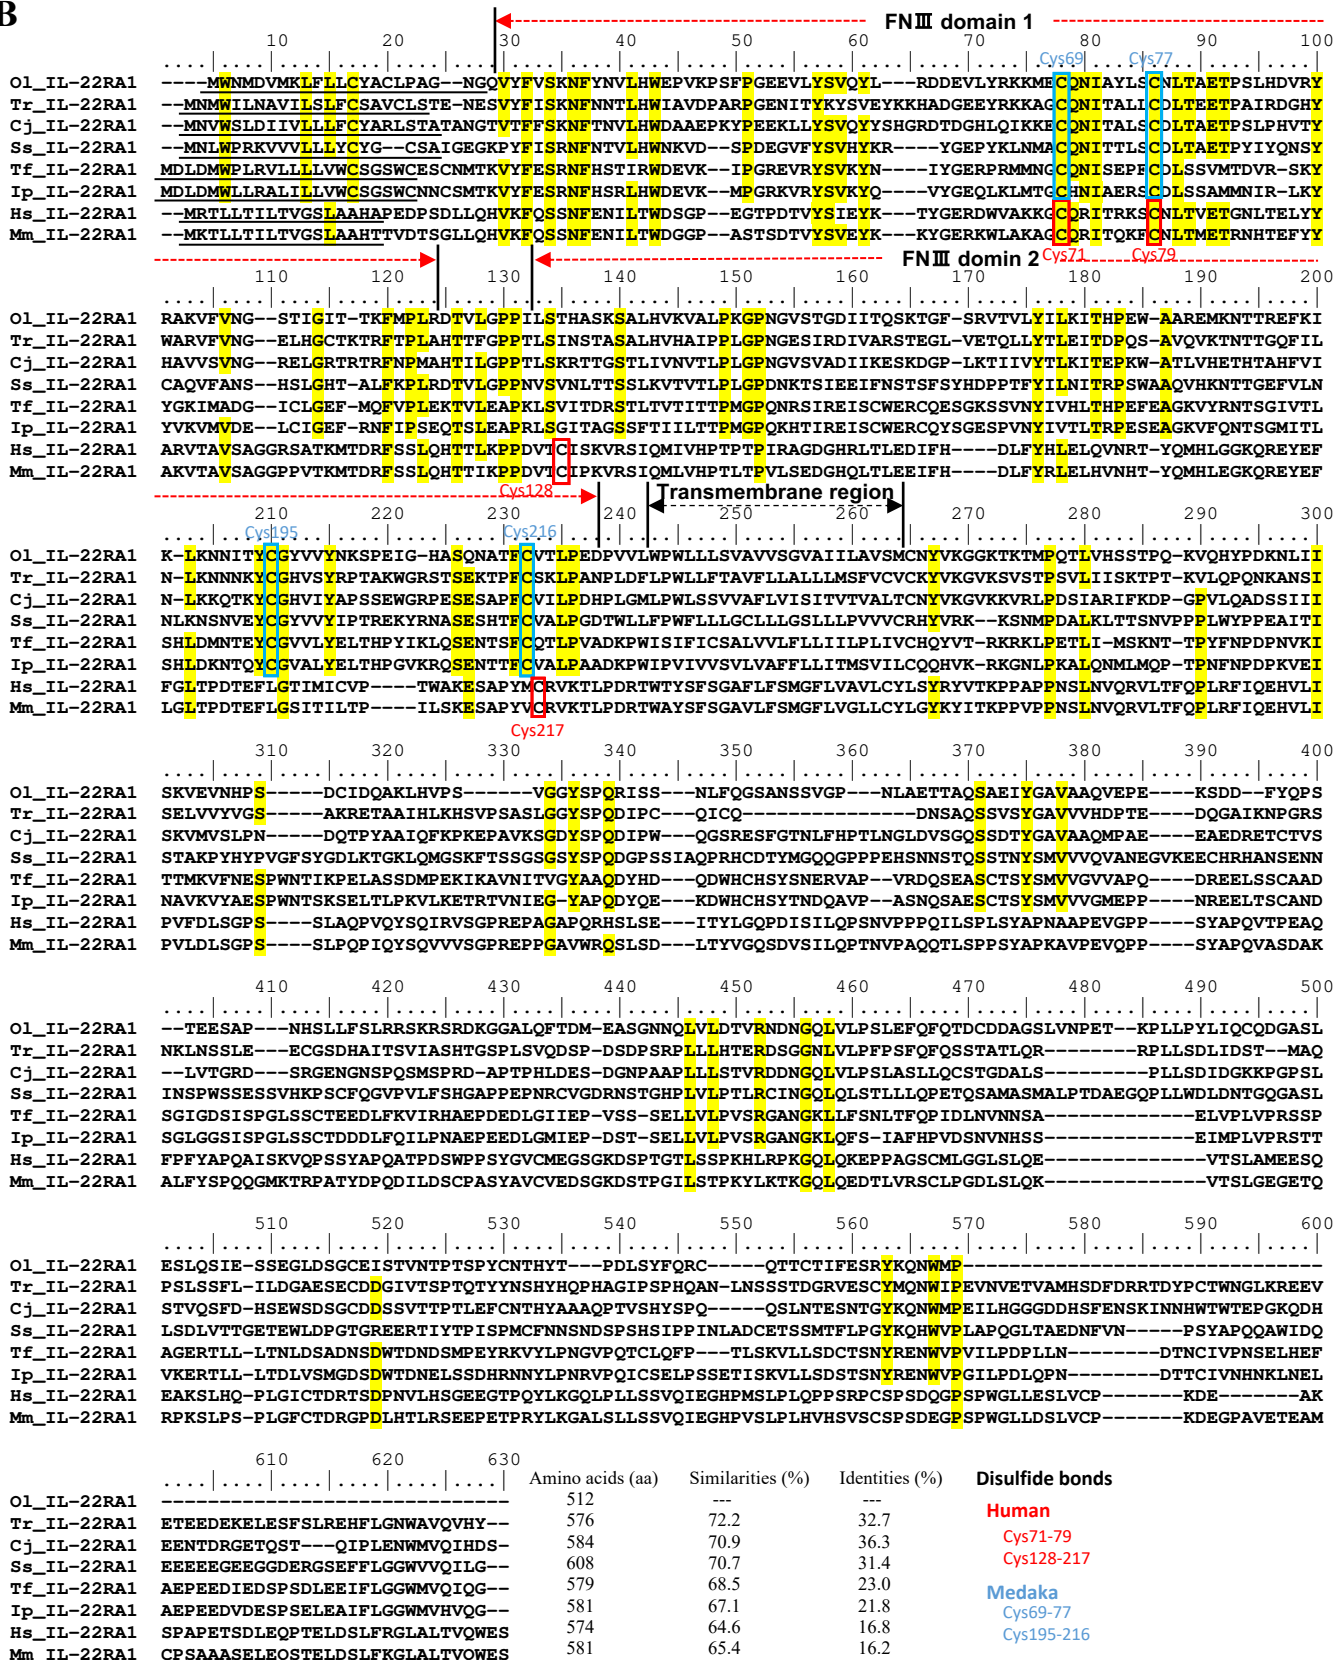

Fig. S1. Continued.

Fig. S1. C

C

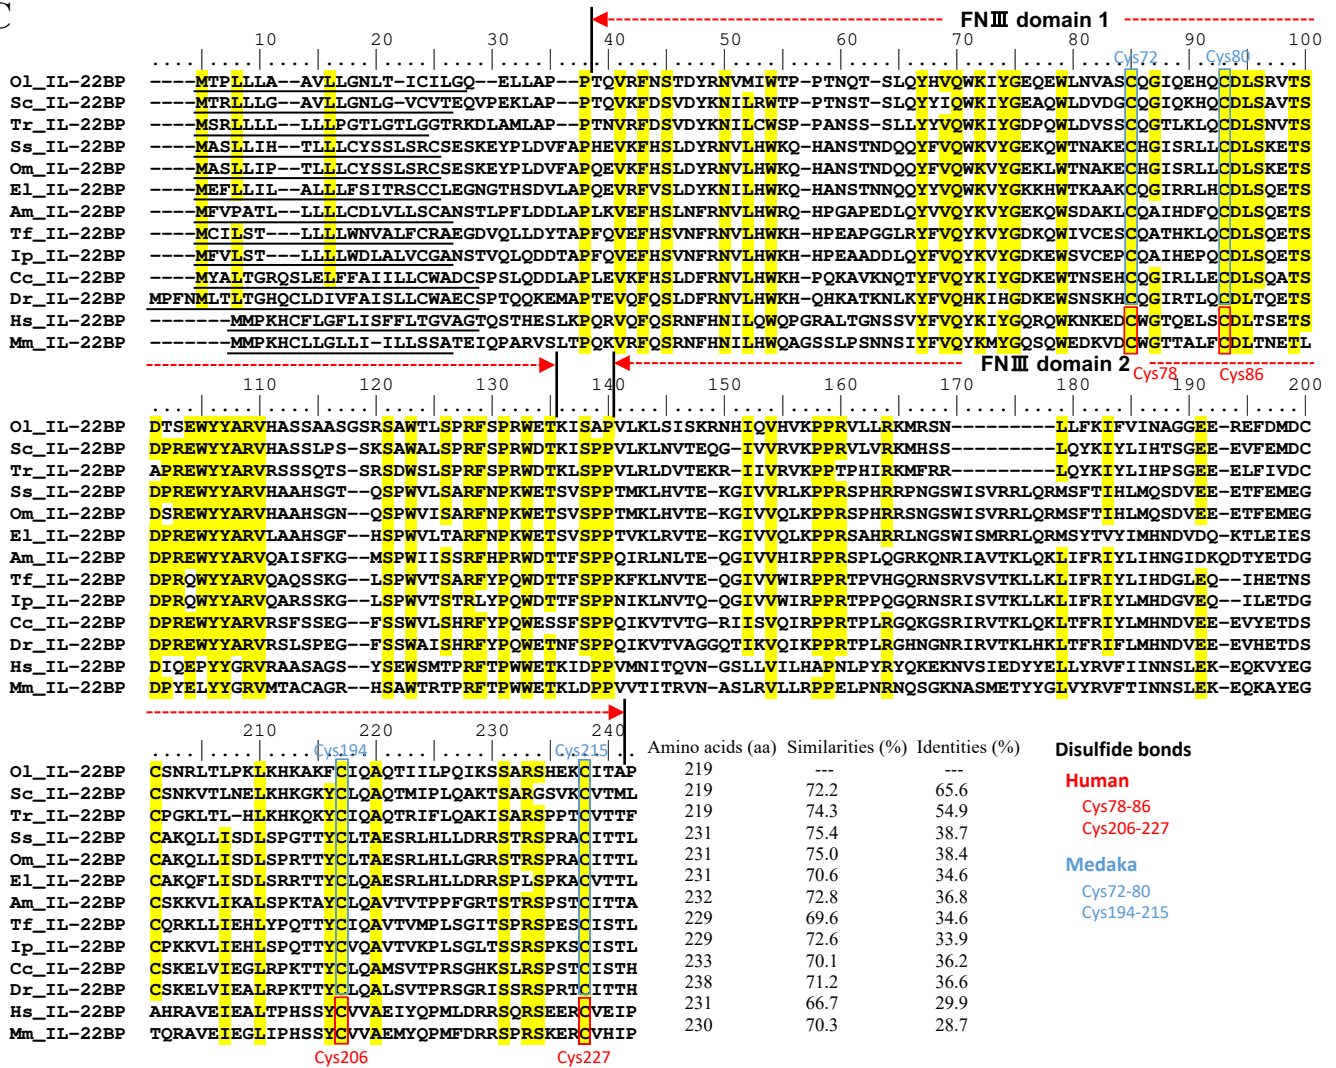

Fig. S1. Continued.

**Fig. S2.**

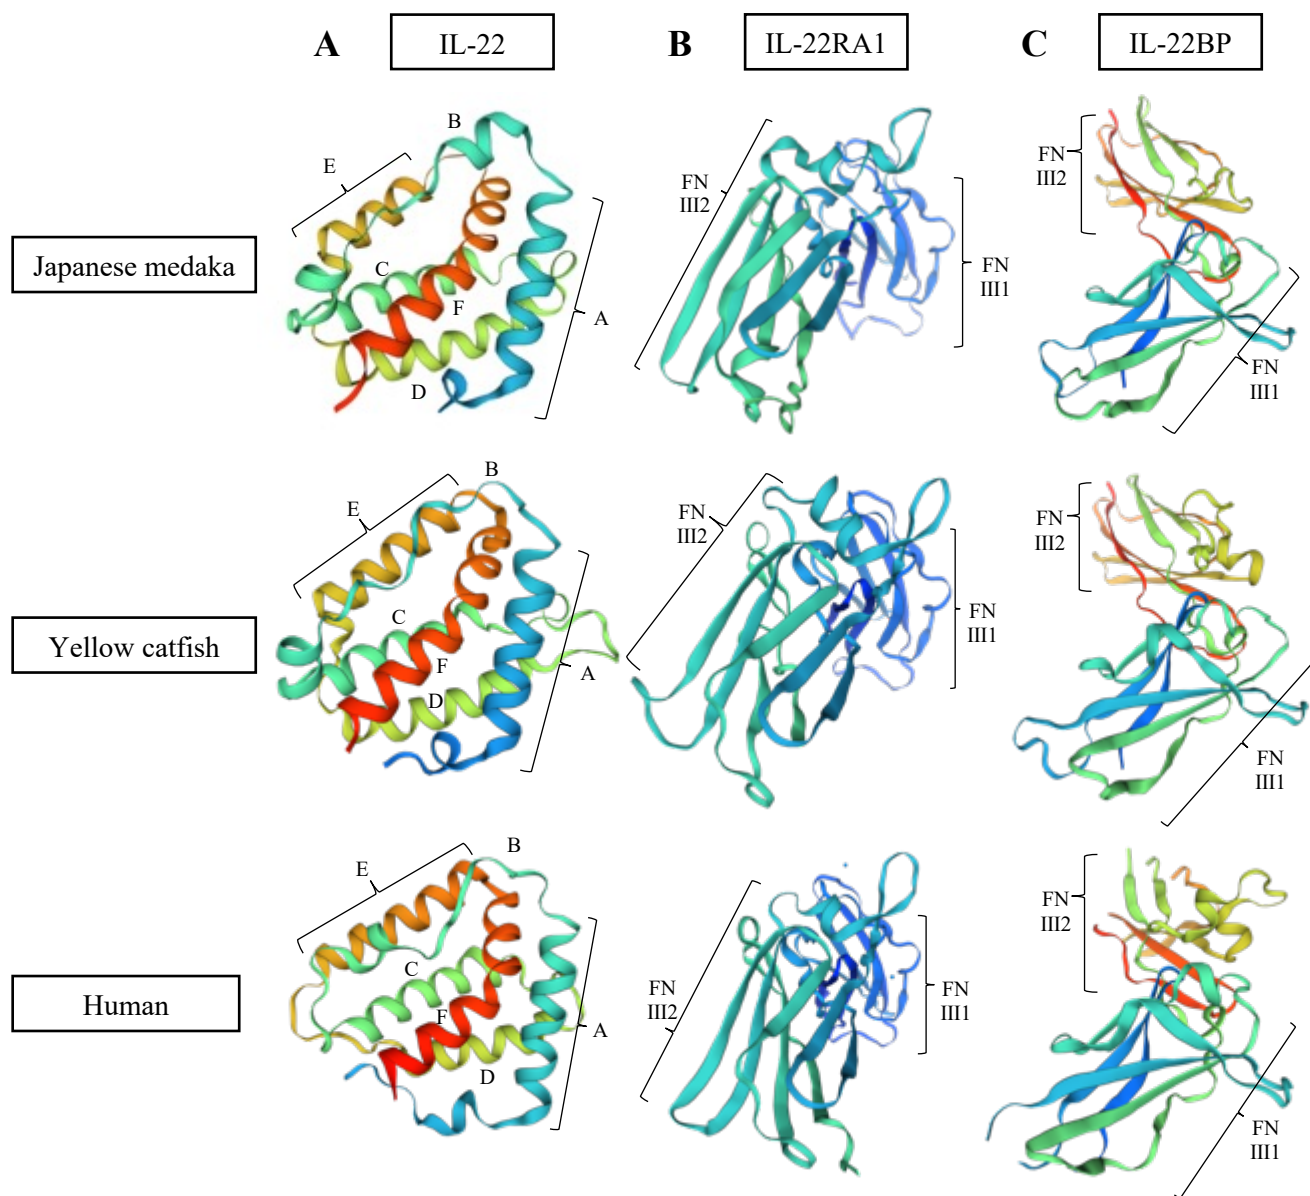

**Fig. S2.** 3D structures of IL-22 (A), IL-22RA1 (B), and IL-22BP (C) in human, yellow catfish, and medaka predicted using SWISS-MODEL. In the predicted 3D structures, the alpha helices A to F in IL-22 and the FNIII domain in IL-22RA1 and IL-22BP are shown. GenBank accession numbers of all nucleotide sequences are listed in **Table S2**.

**Fig. S3.**

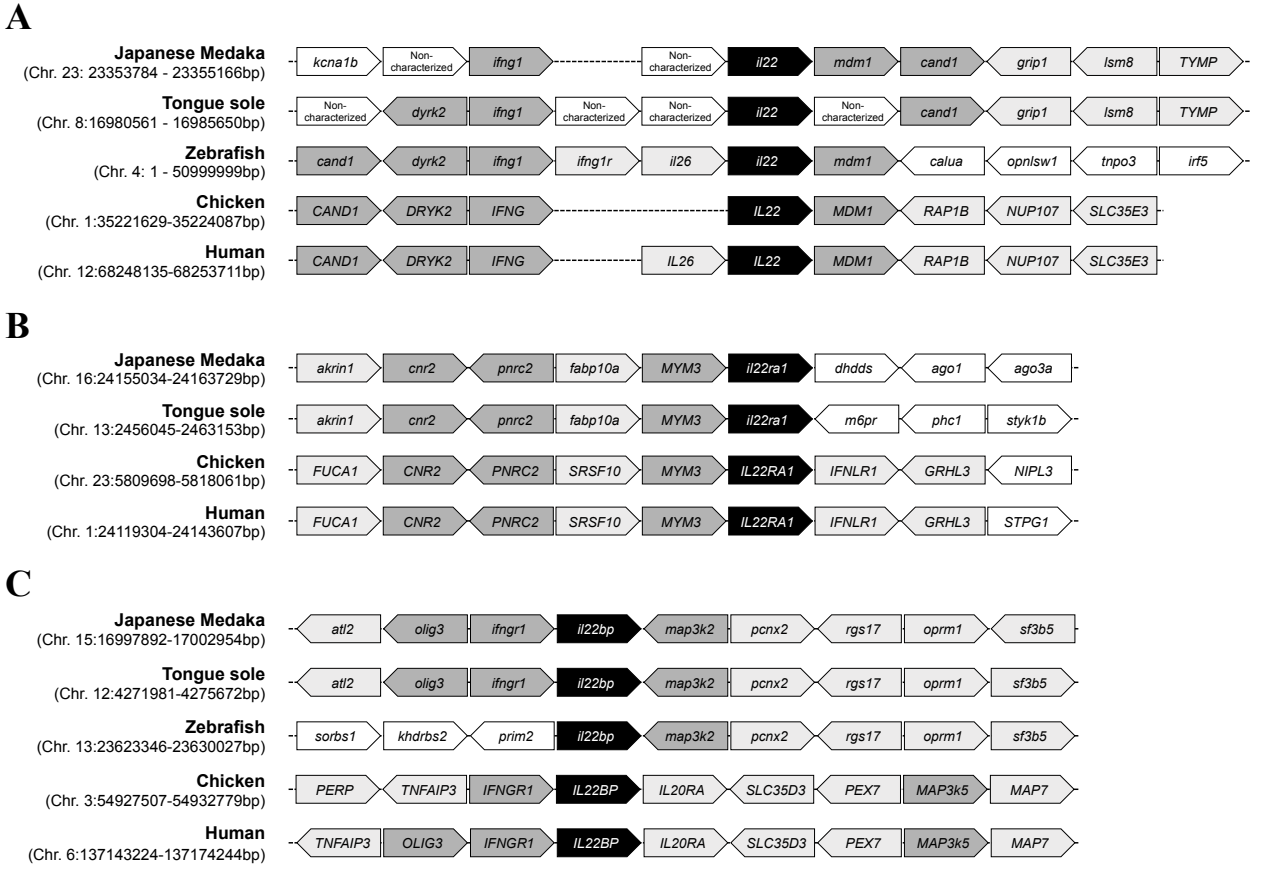

**Fig. S3.** Schematic representation of synteny for *il22* (A), *il22ral* (B), and *il22bp* (C) in various species. *il22*, *il22ral*, and *il22bp* highlighted by the black boxes. The dark gray and light gray boxes represent high and low gene homology, respectively.

Fig. S4.

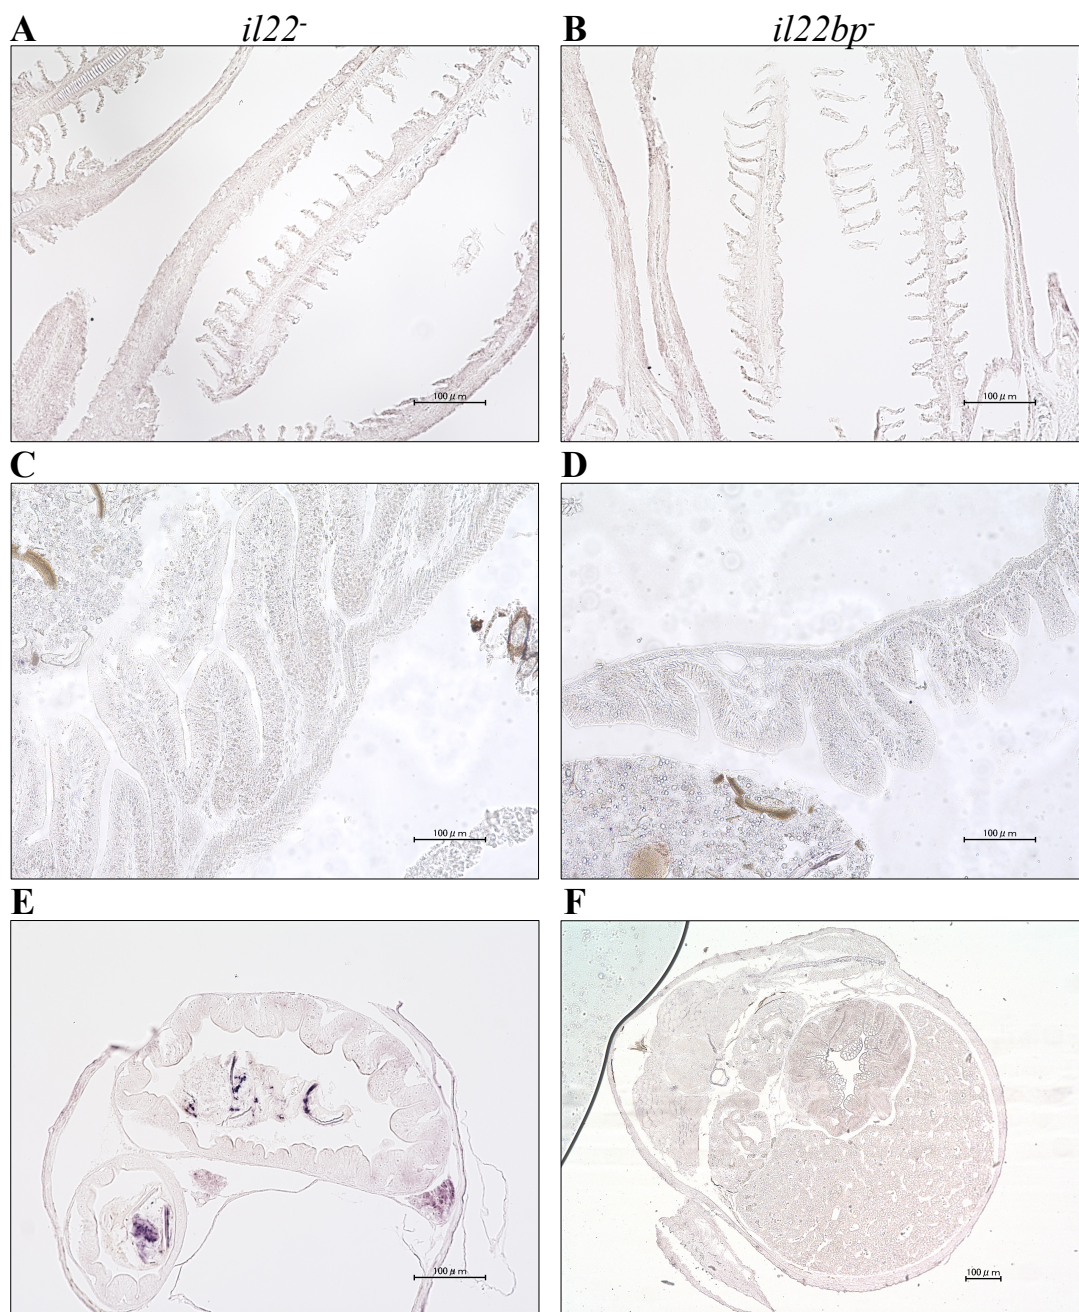

**Fig. S4.** Negative control (sense probe) of *in situ* hybridization (ISH) in medaka *il22* and *il22bp* mRNA localization. *il22* (A) and *il22bp* (B) expression in adult medaka gill; *il22* (C) and *il22bp* (D) expression in adult medaka intestine; *il22* (E) and *il22bp* (F) expression in larval medaka intestine. Scale bar: 100 µm. After 4% (v/v) paraformaldehyde fixation, the gills and intestines of healthy adult medaka and the whole body of the larvae were embedded in paraffin. DIG-labeled anti-sense RNA-probes were used for detection. After hybridization, color development was performed using AP-labeled anti-DIG IgG (sheep) and NBT/BCIP solution.

(A)

*il22* gene in Japanese medaka Cab strain

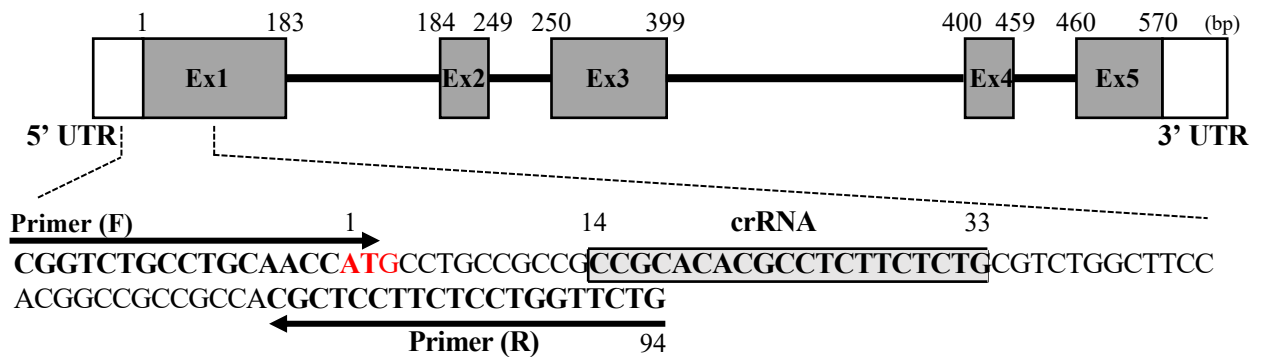

(B)

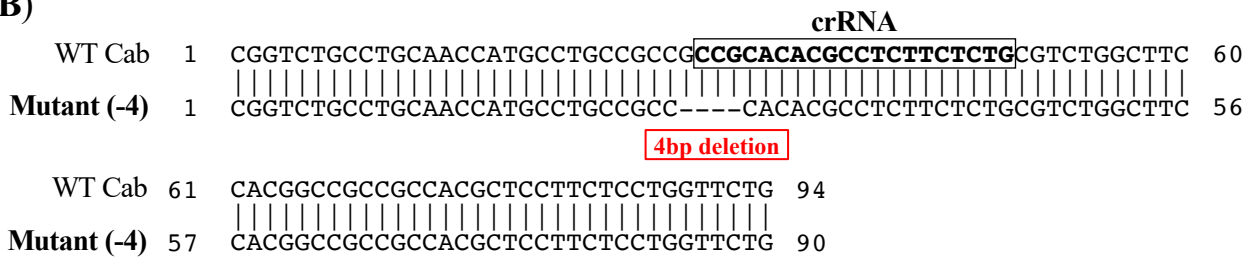

(C)

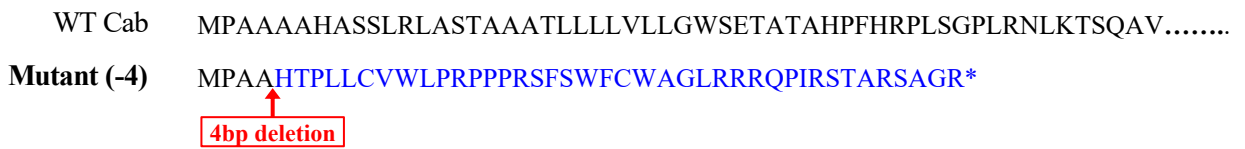

(D)

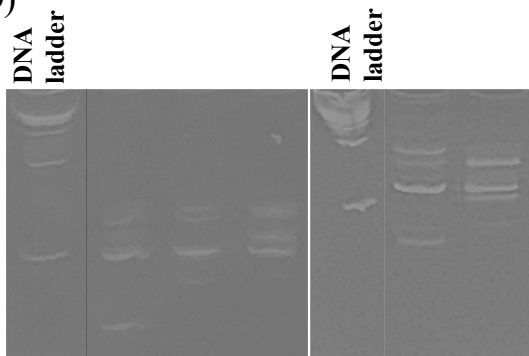

(E)

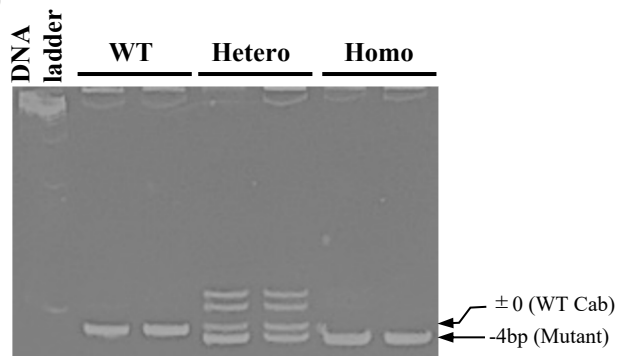

**Fig. S5.** crRNA regions, mutated sequences, and mutation efficiency of medaka *il22*. (A) crRNA regions in medaka *il22*. crRNA designed in exon 1 of *il22*. Mutated nucleotide (B) and amino acid sequences (C) in WT and KO strains. Mutated regions in filial generation zero (F0) founder and F3 homo individuals confirmed by sequencing. The asterisk (\*) indicates the stop codon. Mutant strains contained premature stop codons in the amino acid sequences introduced by frameshift mutations. (D) Efficiency of mutation determined using crRNA and the heteroduplex mobility assay (HMA). (E) HMA for mutated medaka; a 4 bp deletion shown in a 12% agarose gel.



Fig. S6.

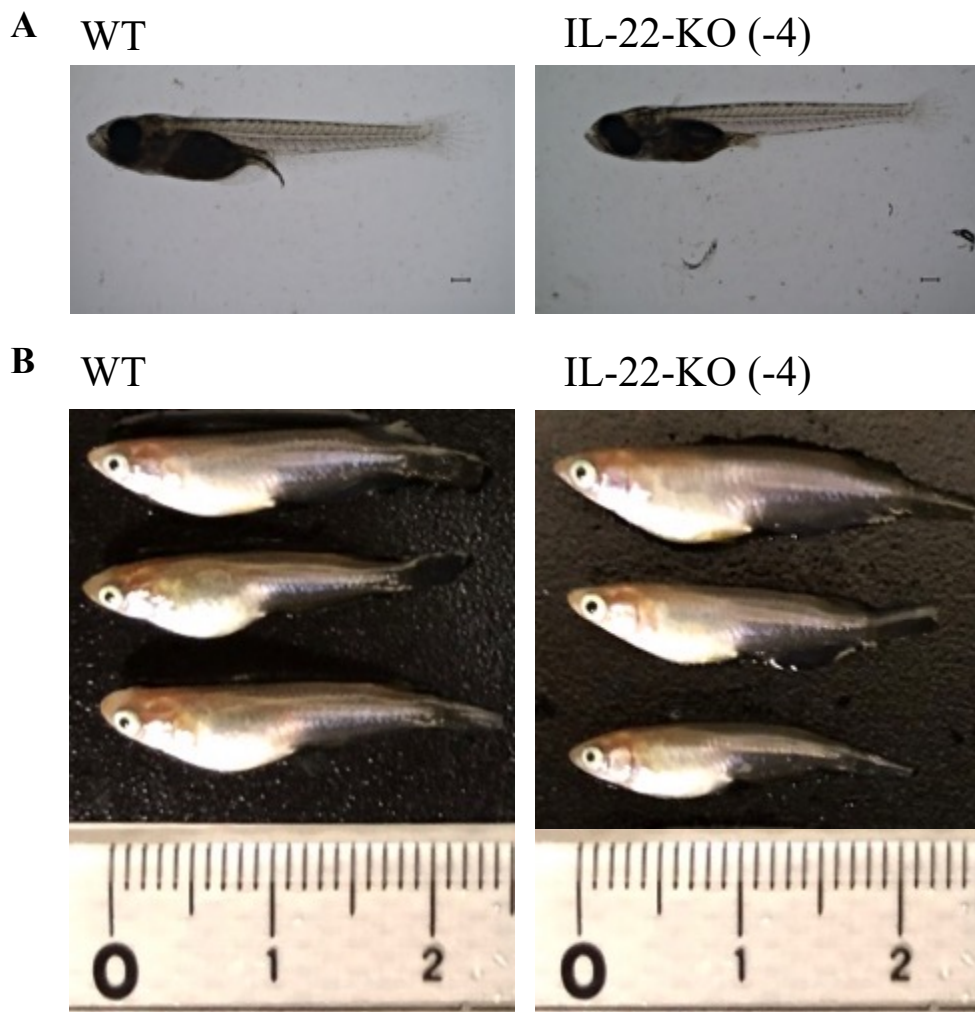

**Fig. S6.** Morphological comparison of WT and IL-22-KO medaka (-4). No morphological differences were observed between the KO strain (4 bp deletion strain) and WT medaka when 14 days post-fertilization larvae (**A**) and 3-month adult medaka (**B**) were observed.

Fig. S7.

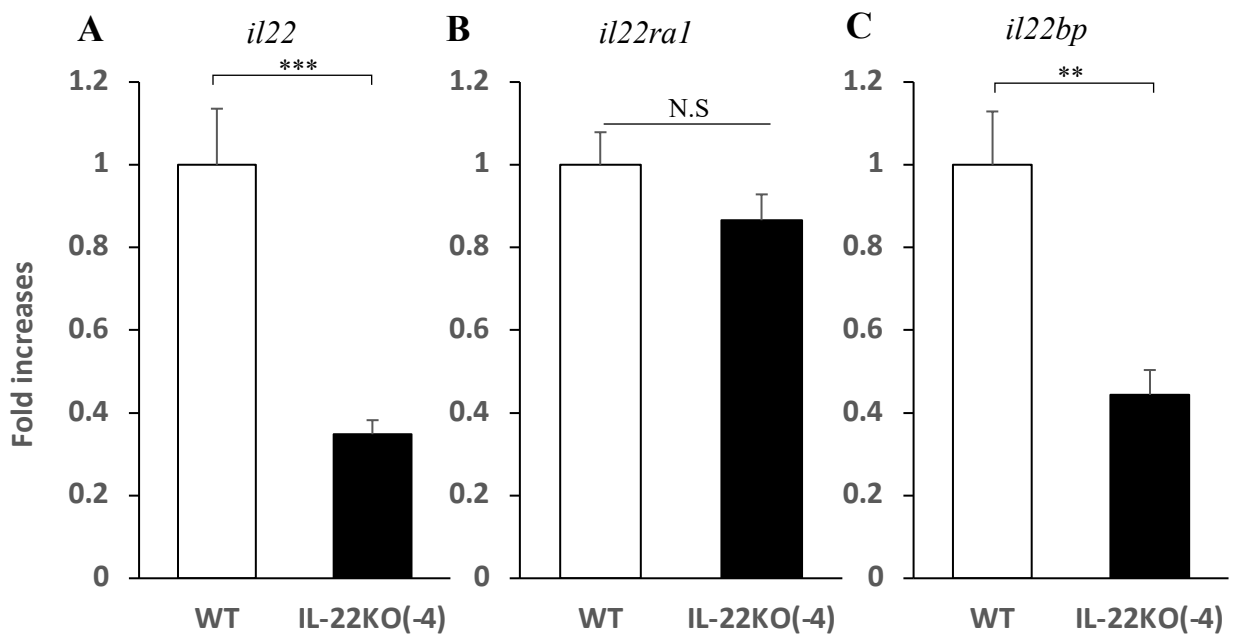

**Fig. S7.** Gene expression analyses of *il22* (A), *il22ral* (B), and *il22bp* (C) in WT and KO medaka. Significant *il22* and *il22bp* downregulation was observed in KO (4 bp-deficient) medaka larvae compared with that in WT. Comparisons were performed on healthy medaka. The expression scale shows relative values when the expression in the WT group was set to 1. \*\*\*,  $P < 0.001$ , \*\*,  $P < 0.01$ , \*,  $P < 0.05$  (two-tailed Student's  $t$ -test). Data shown were obtained from a single experiment ( $n = 7$ ).

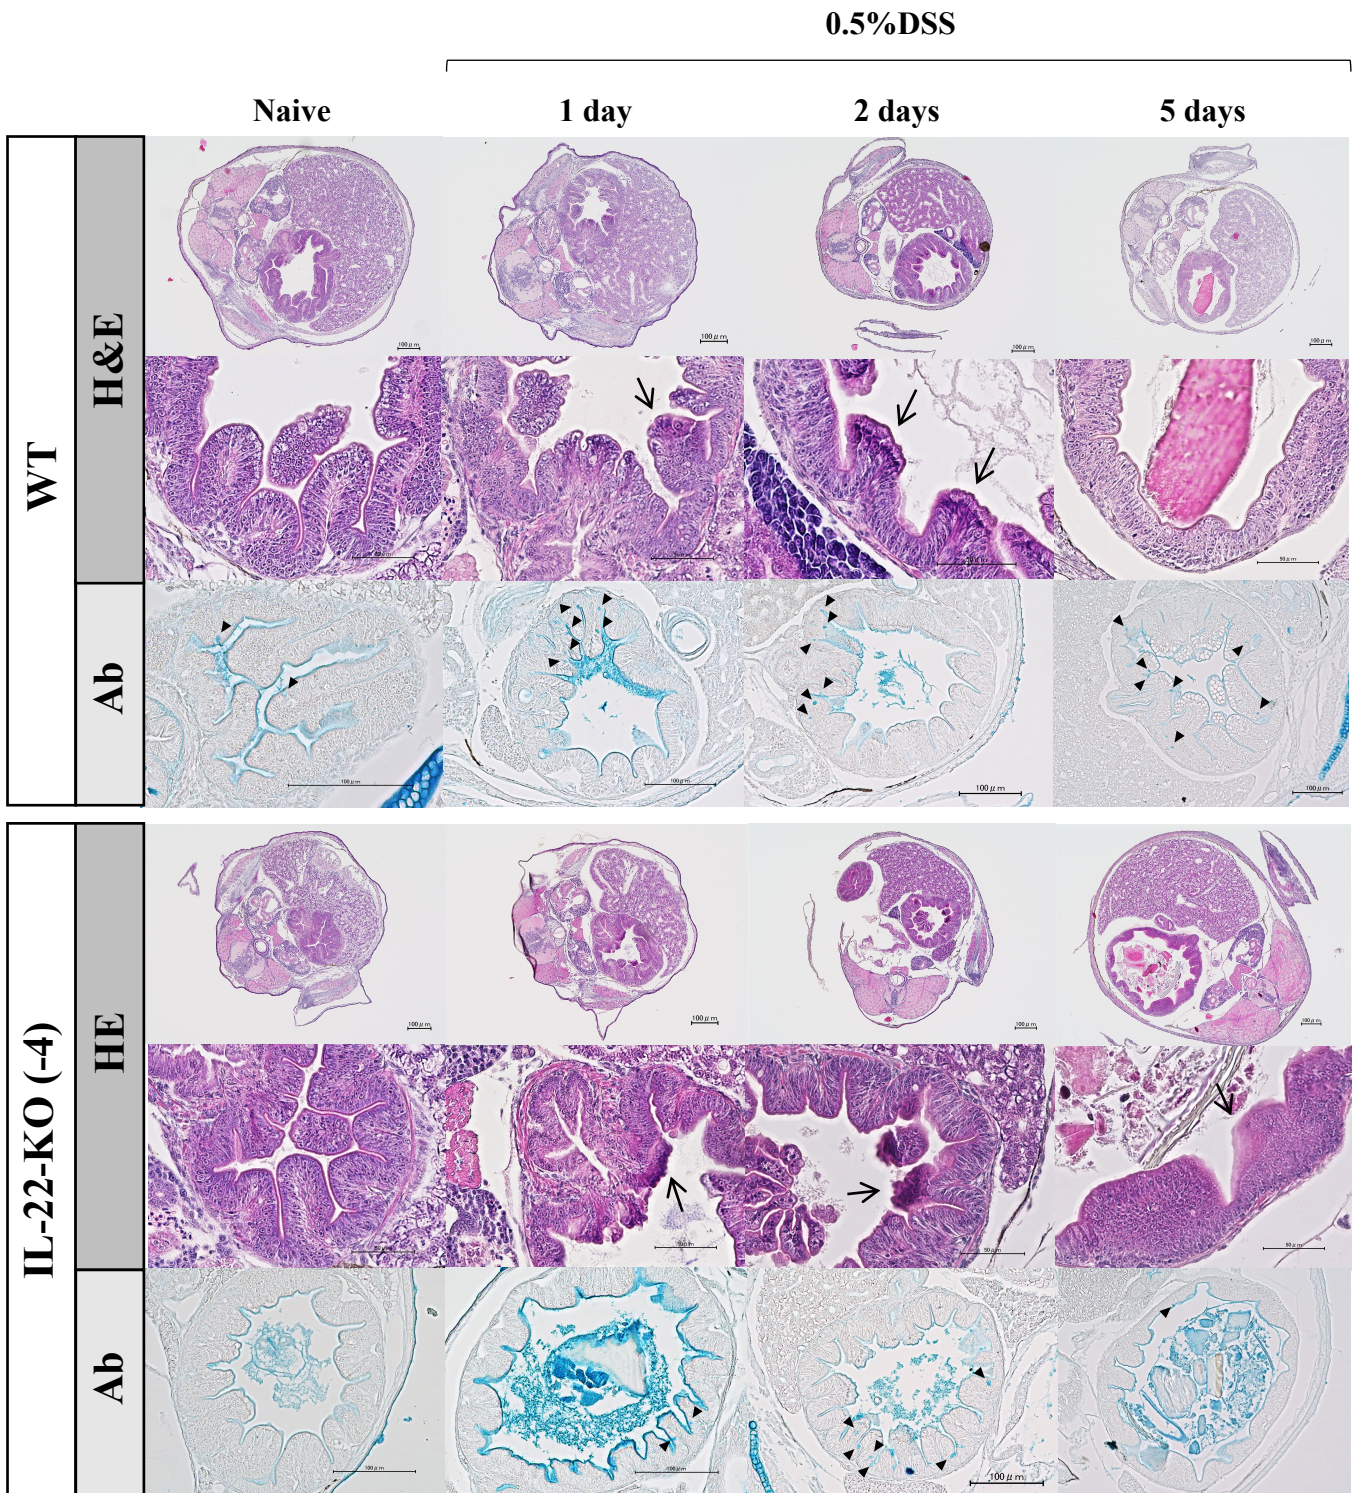

**Fig. S8.** Histological analysis of dextran sulfate sodium (DSS)-induced inflammation in WT and IL-22-KO medaka larvae. Samples of the anterior intestinal tissue sections from WT and IL-22-KO medaka at 1, 2, and 5 days after DSS stimulation and staining with hematoxylin-eosin (H&E) and Alcian blue (AB). All larval WT and IL-22KO medaka used were at 14 days post-fertilization. Arrows indicate the changes in tissue architecture caused by DSS. The arrowheads (▼) indicate the AB-positive cells.

Fig. S9.

A

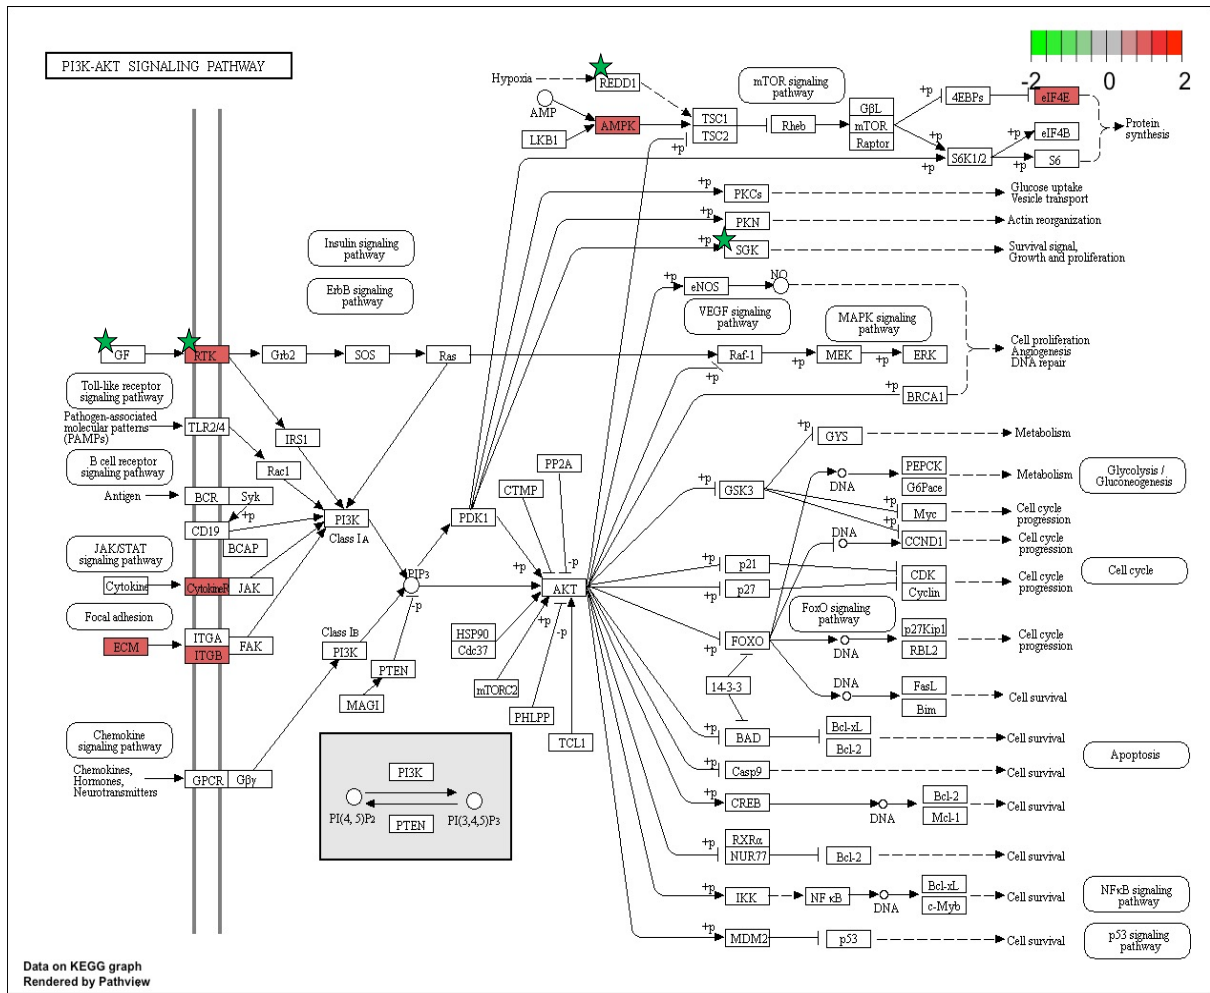

B

| Gene_ID                             | Gene name                                                 | Gene Symbol | WT_DSS / WT* <sup>1</sup> |         | IL-22-KO (-4)_DSS / WT_DSS* <sup>2</sup> |         |
|-------------------------------------|-----------------------------------------------------------|-------------|---------------------------|---------|------------------------------------------|---------|
|                                     |                                                           |             | Fold change               | p_value | Fold change                              | p_value |
| <b>Up (WT / WT_DSS)</b>             |                                                           |             |                           |         |                                          |         |
| ENSORLG00000017636                  | eukaryotic translation initiation factor 4E               | eif4e       | 1.974                     | 0.039   | 1.071                                    | n.s.    |
| ENSORLG00000018568                  | Insulin receptor                                          | insr        | 2.373                     | 0.015   | 0.920                                    | n.s.    |
| ENSORLG00000003389                  | Integrin beta-3                                           | itgb3       | 2.393                     | 0.014   | 0.947                                    | n.s.    |
| ENSORLG00000022689                  | laminin subunit gamma-2                                   | lanc2       | 2.005                     | 0.042   | 0.938                                    | n.s.    |
| ENSORLG00000023149                  | oncostatin-M-specific receptor subunit beta               | osmr        | 2.054                     | 0.046   | 0.638                                    | n.s.    |
| ENSORLG00000001742                  | 5'-AMP-activated protein kinase catalytic subunit alpha-2 | prkaa2      | 2.401                     | 0.015   | 0.679                                    | n.s.    |
| <b>Down (WT_DSS / IL-22-KO_DSS)</b> |                                                           |             |                           |         |                                          |         |
| ENSORLG000000009171                 | DNA damage inducible transcript 4                         | ddit4       | 0.664                     | n.s.    | 0.613                                    | 0.044   |
| ENSORLG00000009764                  | DNA damage-inducible transcript 4-like protein            | ddit4l      | 4.172                     | n.s.    | 0.484                                    | 0.018   |
| ENSORLG000000000289                 | fibroblast growth factor 19                               | fgf19       | 0.756                     | n.s.    | 0.287                                    | 0.015   |
| ENSORLG00000024957                  | insulin-like growth factor-binding protein 1              | igfbp1      | 1.476                     | n.s.    | 0.558                                    | 0.029   |
| ENSORLG00000009059                  | serine/threonine-protein kinase Sgk1                      | sgk1        | 1.372                     | n.s.    | 0.577                                    | 0.034   |

**Fig. S9.** The PI3K-Akt signaling pathway maps of differentially expression gene (DEG) hits determined using data from the Kyoto Encyclopedia of Genes and Genomes (KEGG) database. (A) WT medaka stimulated with DSS showed upregulation of genes related to the “PI3K-Akt” pathway (red). IL-22-KO medaka stimulated with DSS showed downregulation of genes related to the “PI3K-Akt” pathway (green-star). (B) Eleven DEGs showed significant localization in WT and IL-22-KO medaka stimulated with DSS.

A

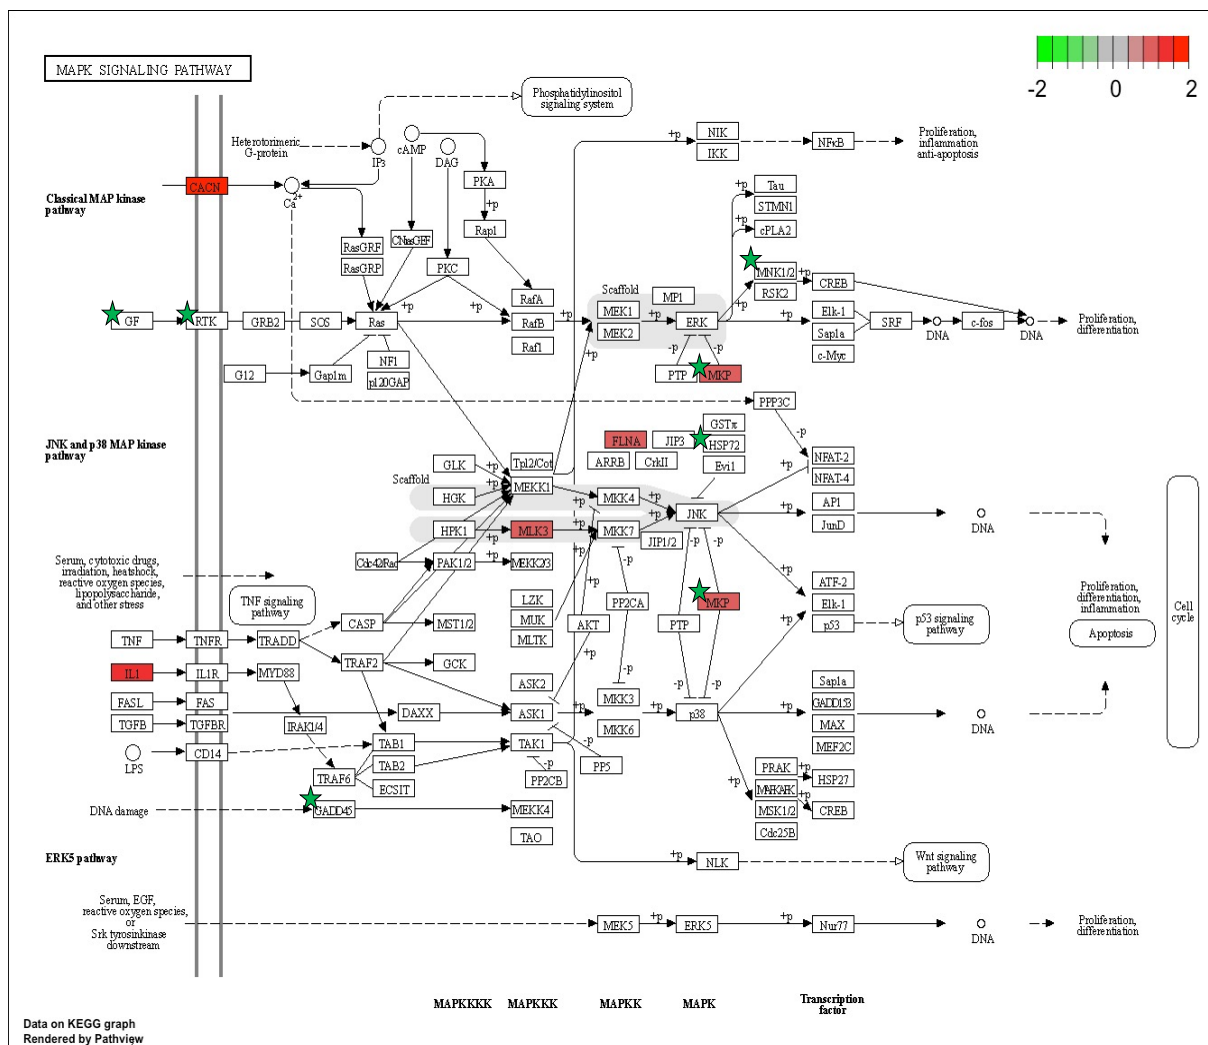

B

| Gene_ID                             | Gene name                                                   | Gene Symbol | WT_DSS / WT <sup>+1</sup> |         | IL-22-KO (-4)_DSS / WT_DSS <sup>+2</sup> |         |
|-------------------------------------|-------------------------------------------------------------|-------------|---------------------------|---------|------------------------------------------|---------|
|                                     |                                                             |             | Fold change               | p_value | Fold change                              | p_value |
| <b>Up (WT / WT_DSS)</b>             |                                                             |             |                           |         |                                          |         |
| ENSORLG00000025805                  | voltage-dependent P/Q-type calcium channel subunit alpha-1A | cacna1a     | 2.523                     | 0.020   | 0.889                                    | n.s.    |
| ENSORLG00000008618                  | voltage-dependent T-type calcium channel subunit alpha-1H   | cacna1h     | 2.160                     | 0.032   | 0.816                                    | n.s.    |
| ENSORLG000000015184                 | dual specificity phosphatase 5                              | dusp5       | 2.423                     | 0.014   | 0.513                                    | 0.022   |
| ENSORLG000000004247                 | filamin-C                                                   | flnc        | 1.921                     | 0.041   | 0.868                                    | n.s.    |
| ENSORLG00000000217                  | interleukin-1 beta                                          | il1b        | 2.545                     | 0.012   | 1.056                                    | n.s.    |
| ENSORLG000000011136                 | mitogen-activated protein kinase kinase kinase 11           | map3k11     | 2.040                     | 0.047   | 0.974                                    | n.s.    |
| <b>Down (WT_DSS / IL-22-KO_DSS)</b> |                                                             |             |                           |         |                                          |         |
| ENSORLG000000009024                 | MAPK interacting serine/threonine kinase 2                  | mknk2       | 1.041                     | n.s.    | 0.620                                    | 0.048   |
| ENSORLG000000015184                 | dual specificity phosphatase 5                              | dusp5       | 2.423                     | 0.014   | 0.513                                    | 0.022   |
| ENSORLG00000000289                  | fibroblast growth factor 19                                 | fgf19       | 0.756                     | n.s.    | 0.287                                    | 0.015   |
| ENSORLG000000022536                 | growth arrest and DNA damage-inducible protein GADD45 beta  | gadd45b     | 1.242                     | n.s.    | 0.593                                    | 0.047   |
| ENSORLG000000030080                 | growth arrest and DNA damage-inducible protein GADD45 gamma | gadd45g     | 1.073                     | n.s.    | 0.545                                    | 0.026   |
| ENSORLG000000006132                 | oryzias latipes heat shock protein 70 (hsp70-5), mRNA       | hsp70-5     | 0.786                     | n.s.    | 0.476                                    | 0.038   |
| ENSORLG000000023848                 | neurotrophic receptor tyrosine kinase 1                     | ntkr1       | 0.930                     | n.s.    | 0.527                                    | 0.026   |

**Fig. S10.** MAPK signaling pathway maps of differentially expressed gene (DEG) hits determined using data from the Kyoto Encyclopedia of Genes and Genomes (KEGG) database. (A) WT medaka stimulated with dextran sulfate sodium (DSS) showed upregulation of genes related to the “MAPK” pathway (red). IL-22-KO medaka stimulated with DSS showed downregulation of genes related to the “MAPK” pathway (green-star). (B) Twelve DEGs showed significant localization in WT and IL-22-KO medaka stimulated with DSS.

**Fig. S11.**

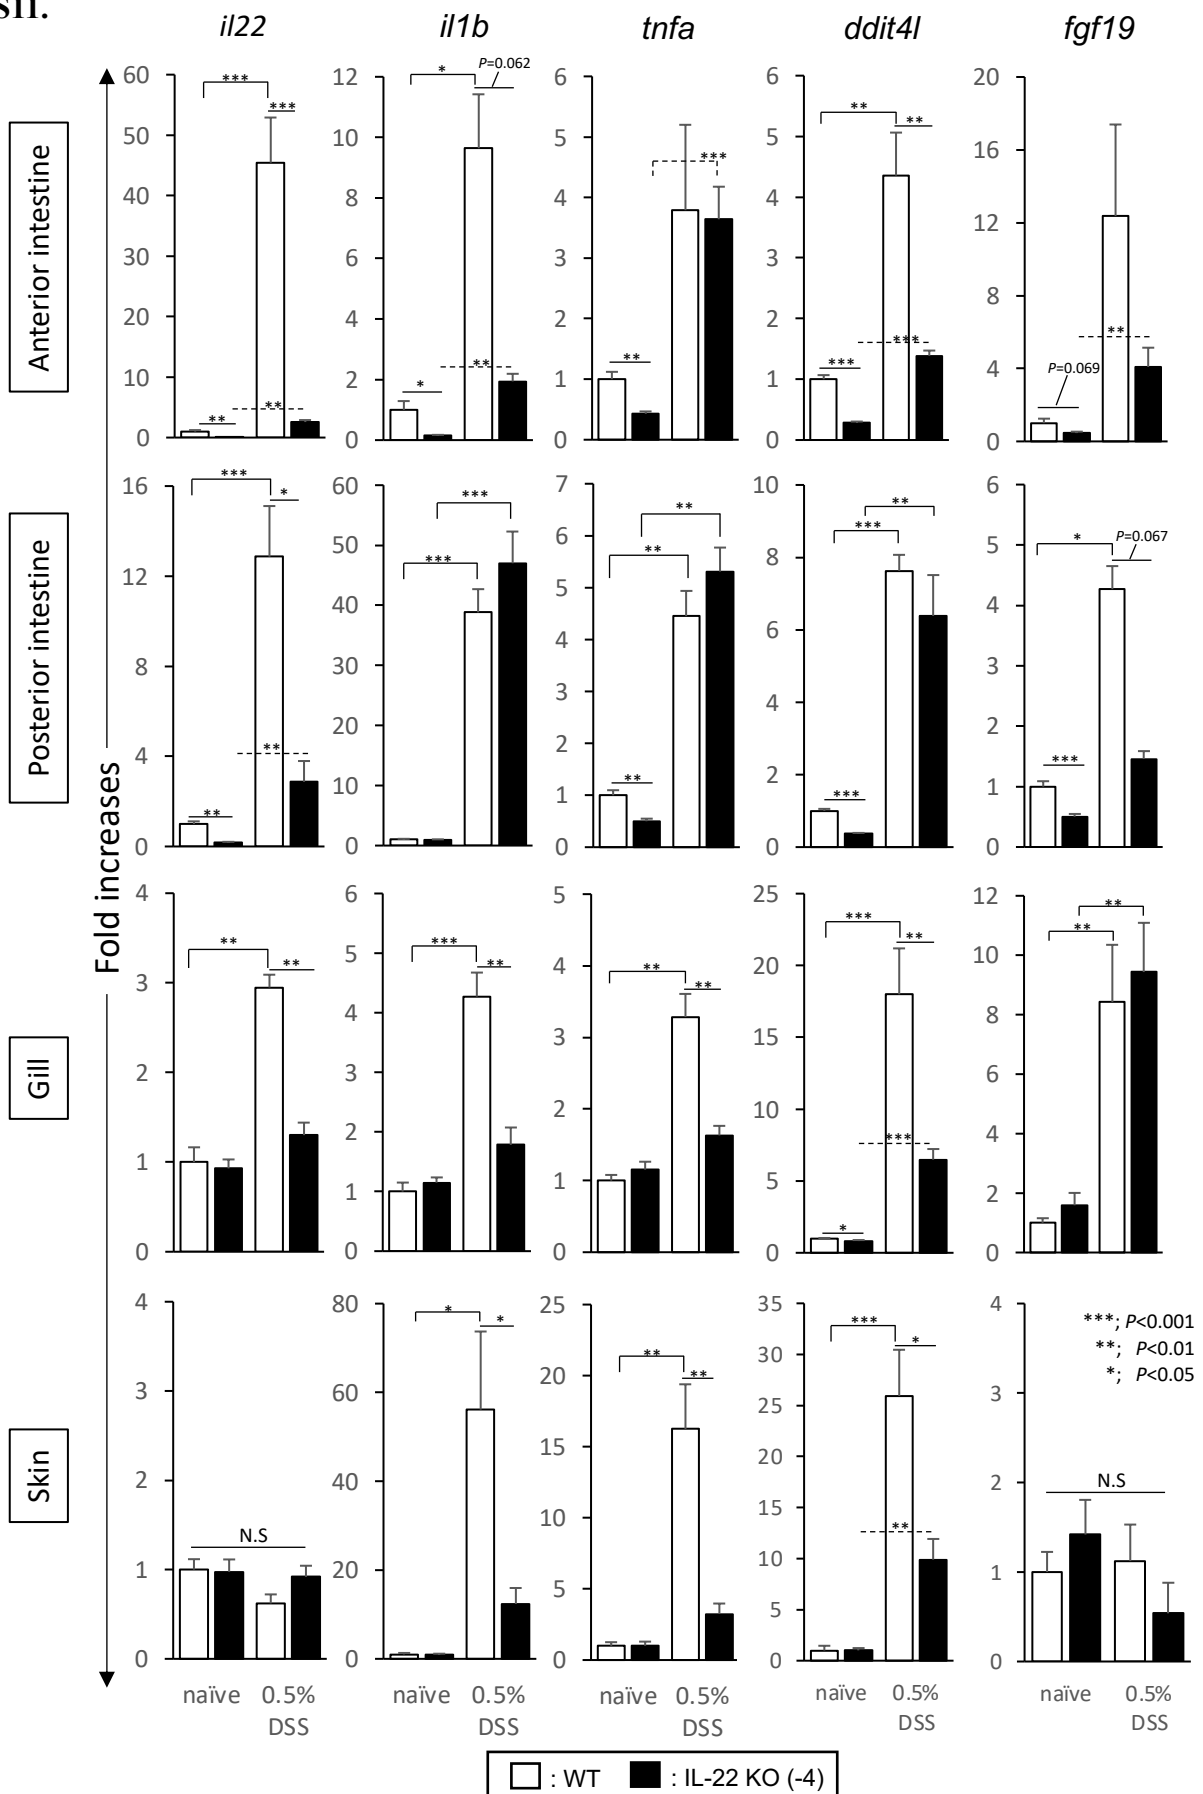

**Fig. S11.** Real-time PCR (qPCR) analysis of inflammatory cytokines and multiple genes related to the PI3K-Akt and MAPK signaling pathways. The expression of inflammatory cytokine (*il22*, *il1b*, and *tnfa*) and PI3K-Akt and MAPK signaling pathway-related genes (*ddit4l* and *fgf19*) in the intestines, gills, and skin of adult medaka was quantified using qPCR. *ddit4l* and *fgf19* were chosen as the target genes based on the qPCR and RNA-seq results in the dextran sulfate sodium (DSS) stimulation experiment using larval medaka. DSS stimulation was performed by the immersion method in the larval experiment. The expression scale shows the relative values obtained when the expression of the naïve WT group was set to 1. Data represent the mean  $\pm$  SEM from five individual medaka in each group (n=5). \*\*\*,  $P < 0.001$ , \*\*,  $P < 0.01$ , \*,  $P < 0.05$  (two-tailed Student's *t*-test).

A

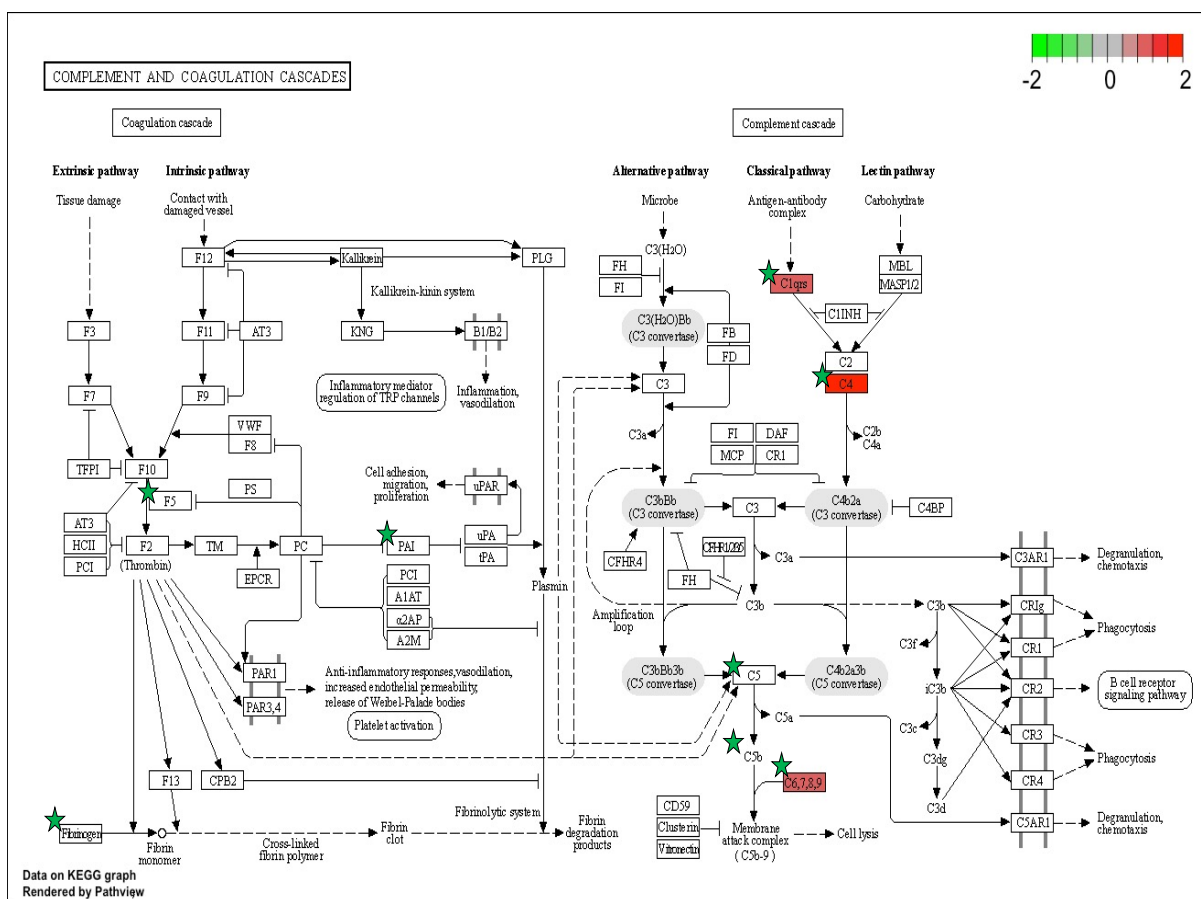

B

| Gene_ID                             | Gene name                             | Gene Symbol | WT_DSS / WT <sup>*1</sup> |         | IL-22-KO (-4)_DSS / WT_DSS <sup>*2</sup> |         |
|-------------------------------------|---------------------------------------|-------------|---------------------------|---------|------------------------------------------|---------|
|                                     |                                       |             | Fold change               | p_value | Fold change                              | p_value |
| <b>Up (WT / WT_DSS)</b>             |                                       |             |                           |         |                                          |         |
| ENSORLGG00000026388                 | complement C1q subcomponent subunit C | c1qc        | 2.361                     | 0.014   | 0.148                                    | n.s.    |
| ENSORLGG00000027110                 | complement C1q-like protein 2         | c1ql2       | 3.038                     | 0.035   | 0.367                                    | 0.038   |
| ENSORLGG00000006961                 | complement C4                         | c4b         | 5.141                     | 0.005   | 0.303                                    | 0.019   |
| ENSORLGG00000014843                 | complement C6                         | c6          | 2.410                     | 0.013   | 0.482                                    | 0.015   |
| <b>Down (WT_DSS / IL-22-KO_DSS)</b> |                                       |             |                           |         |                                          |         |
| ENSORLGG00000027110                 | complement C1q-like protein 2         | c1ql2       | 3.038                     | 0.035   | 0.367                                    | 0.038   |
| ENSORLGG00000012352                 | complement C1r                        | c1r         | 1.694                     | n.s.    | 0.482                                    | 0.038   |
| ENSORLGG00000006961                 | complement C4                         | c4b         | 5.141                     | 0.005   | 0.303                                    | 0.019   |
| ENSORLGG00000006939                 | complement C4                         | c4b         | 1.383                     | n.s.    | 0.449                                    | 0.024   |
| ENSORLGG00000017552                 | complement C5                         | c5          | 1.484                     | n.s.    | 0.561                                    | 0.028   |
| ENSORLGG00000014843                 | complement C6                         | c6          | 2.410                     | 0.013   | 0.482                                    | 0.015   |
| ENSORLGG00000014812                 | complement C7                         | c7          | 1.394                     | n.s.    | 0.594                                    | 0.042   |
| ENSORLGG00000013399                 | Coagulation Factor V                  | f5          | 1.671                     | n.s.    | 0.579                                    | 0.033   |
| ENSORLGG00000002453                 | fibrinogen alpha chain                | fga         | 1.717                     | n.s.    | 0.614                                    | 0.042   |
| ENSORLGG00000008257                 | fibrinogen gamma chain                | fgg         | 1.542                     | n.s.    | 0.626                                    | 0.047   |
| ENSORLGG00000010473                 | serpin family E member 1              | serpine1    | 1.678                     | n.s.    | 0.488                                    | 0.038   |

C

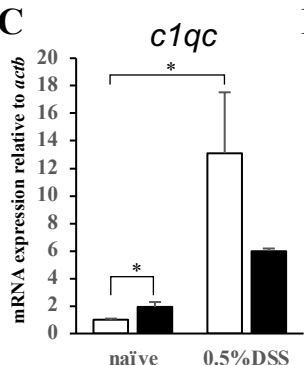

D

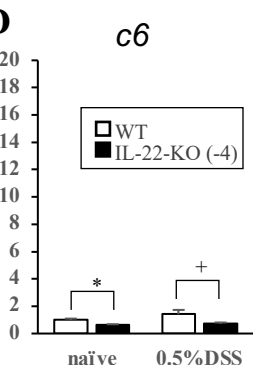

**Fig. S12.** Complement cascade maps of differentially expressed gene (DEG) hits determined using data from the Kyoto Encyclopedia of Genes and Genomes (KEGG) database. (A) WT medaka stimulated with dextran sulfate sodium (DSS) showed upregulation of genes related to the “complement” cascade (red). IL-22-KO medaka stimulated with DSS showed downregulation of genes related to the “complement” cascade (green-star). (B) Twelve DEGs showed significant localization in WT and IL-22-KO medaka stimulated with DSS. (C, D) Of the 12 DEGs, the expression of *c1qc* and *c6* was confirmed by qPCR. \*\*\*;  $P < 0.001$ , \*\*;  $P < 0.01$ , \*;  $P < 0.05$ , +;  $P < 0.1$  (two-tailed Student’s *t*-test). Data shown were obtained from a single experiment ( $n=7$ ).

Fig. S13.

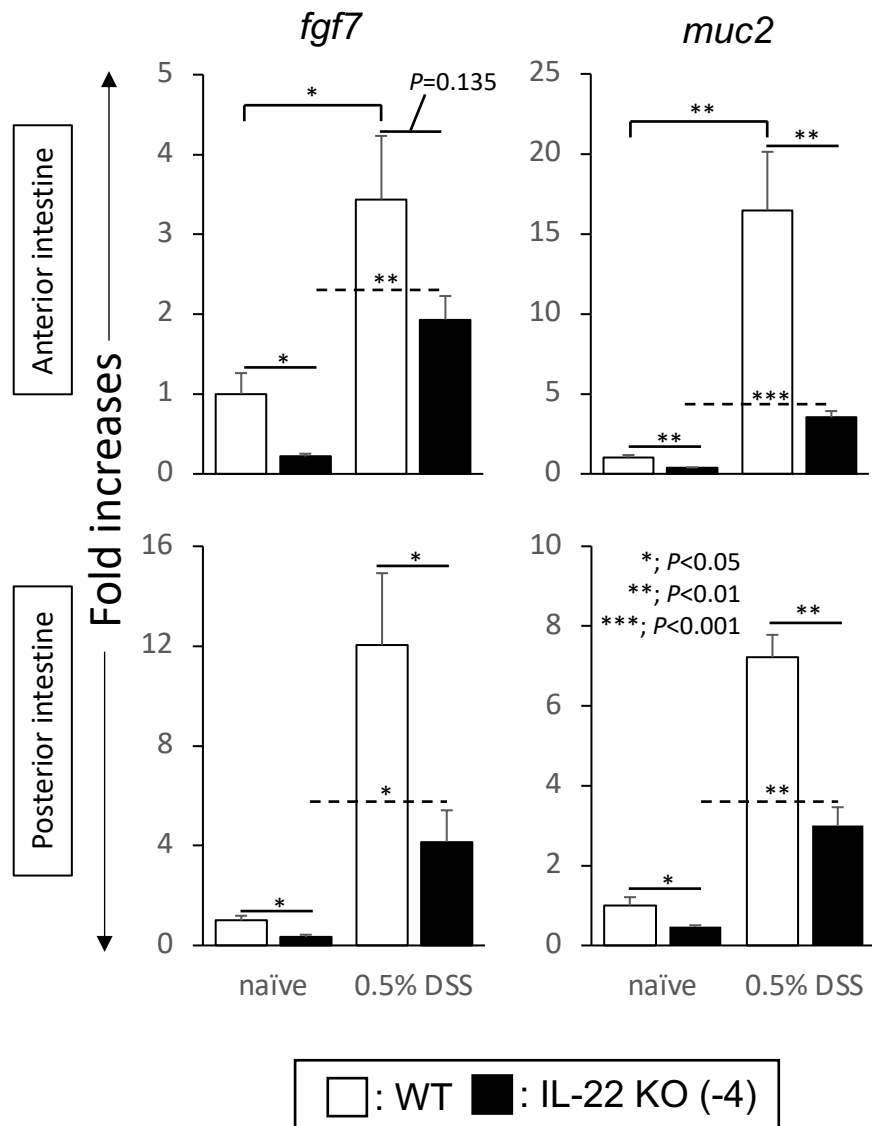

**Fig. S13.** Real-time PCR (qPCR) analysis of *fgf7* and *muc2* in the anterior and posterior intestines of adult medaka. Dextran sulfate sodium stimulation was performed by the immersion method in the larval experiment. The expression scale shows the relative values obtained when the expression of the naïve WT group was set to one. Data represent the mean  $\pm$  SEM from five individual medaka in each group (n=5). \*\*\*,  $P < 0.001$ , \*\*,  $P < 0.01$ , \*,  $P < 0.05$  (two-tailed Student's *t*-test).
