# Supplementary material for: Interleukin-22 Deficiency Contributes to Dextran Sulfate Sodium-Induced Inflammation in Japanese Medaka, Oryzias latipes
Source: Front Immunol. 2021 Oct 25;12:688036. doi: 10.3389/fimmu.2021.688036 (PMC8573258; doi:10.3389/fimmu.2021.688036)
Supplement: Supplementary file 5 [file Table_4.xlsx]

## Sheet: Table S4
Table S4. Top 50 DEGs up/downregulated in DSS-exposed WT medaka compared to naïve WT based on fold changing
Gene_ID	Gene name	Gene Symbol	FPKM*1				WT_DSS / WT*2
			WT	IL-22-KO (-4)	WT_DSS	IL-22-KO (-4) _DSS	Fold change	p_value
Down-regulated (WT_DSS / WT)
ENSORLG00000013728	major facilitator superfamily domain-containing protein 4B	mfsd4	0.541642	0.979347	0.0292089	0.116048	0.0539266	0.00104242
ENSORLG00000004947	n/a	n/a	0.183325	0.0116004	0.0122391	0.00785882	0.0667617	0.0236912
ENSORLG00000003145	cathepsin S	ctss	0.235679	0.0733444	0.0303577	0.593388	0.12881	0.0180824
ENSORLG00000007477	interleukin-12ba	il12b	0.398728	0.0497183	0.0743121	0.122098	0.186373	0.0278302
ENSORLG00000006604	uncharacterized LOC101164099	uncharacterized LOC101164099	0.237824	0.0696129	0.0450694	0.784975	0.189508	0.00969934
ENSORLG00000007987	cholesterol 25-hydroxylase-like protein 1, member 1	ch25h	4.38728	4.06211	0.949857	2.93489	0.216502	0.00222495
ENSORLG00000029520	eosinophil peroxidase-like	epx	1.07729	0.343694	0.255741	0.754158	0.237392	0.00416873
ENSORLG00000015300	n/a	n/a	25.1975	24.6301	6.02708	10.56	0.239194	0.0020634
ENSORLG00000022293	homeobox protein Dlx3b-like	dlx3	0.689733	0.57653	0.197688	0.393628	0.286616	0.0247759
ENSORLG00000025867	lactase-phlorizin hydrolase	lct	9.05974	12.6035	3.21694	7.55957	0.355081	0.00344869
ENSORLG00000004244	glutamate decarboxylase like 1	gadl1	11.5996	23.5478	4.16964	5.33904	0.359463	0.00372654
ENSORLG00000027810	eosinophil peroxidase-like	epx	1.77333	0.801898	0.638735	1.70433	0.360189	0.0100043
ENSORLG00000023826	endonuclease domain-containing 1 protein	endod1	1.24284	1.60798	0.448564	0.682237	0.360918	0.0156366
ENSORLG00000011403	sodium- and chloride-dependent GABA transporter ine	slc6a1	5.70499	4.45101	2.14928	3.2755	0.376736	0.00533617
ENSORLG00000000809	sialidase-3-like	neu3	6.07558	6.51783	2.29404	4.05779	0.377583	0.00878761
ENSORLG00000004952	uncharacterized LOC101173774	uncharacterized LOC101173774	9.56378	4.36428	3.6405	3.43245	0.380654	0.00593966
ENSORLG00000012419	angiopoietin-4	angpt4	1.1947	1.09236	0.455196	0.271585	0.381014	0.0372742
ENSORLG00000004146	fatty acid-binding protein, intestinal	fabp2	241.302	244.863	92.3058	167.054	0.382533	0.00435342
ENSORLG00000026048	collagenase 3-like	mmp13	2.62769	2.50384	1.01629	0.959408	0.386763	0.0124761
ENSORLG00000009911	cornifelin-like	cnfn	1.03395	0.241219	0.414407	0.194147	0.4008	0.0470964
ENSORLG00000014020	delta-stichotoxin-Hcr4a	delta-shtx-hcr4a	20.2321	18.1863	8.24915	6.81842	0.407726	0.00657071
ENSORLG00000013560	ATP-sensitive inward rectifier potassium channel 1-like	kcnj1	3.22467	2.10642	1.33002	1.27922	0.412453	0.0208105
ENSORLG00000014023	delta-stichotoxin-Hcr4a	delta-shtx-hcr4a	24.6151	21.4321	10.1606	8.07145	0.412779	0.00710687
ENSORLG00000023881	otoraplin	otor	1.09207	0.41164	0.451725	0.395771	0.413643	0.0149257
ENSORLG00000013346	phospholipase B1	plb1	17.5017	6.70929	7.25081	10.5044	0.414292	0.00665997
ENSORLG00000009679	sodium/glucose cotransporter 1-like	slc5a1	0.649041	0.242767	0.272992	0.293093	0.420608	0.0346374
ENSORLG00000012318	transmembrane channel-like protein 1	tmc1	2.4891	1.67858	1.04853	0.583775	0.42125	0.0150512
ENSORLG00000016528	prostaglandin reductase 1	ptgr1	17.3809	29.4215	7.34275	9.11558	0.42246	0.00849564
ENSORLG00000002987	solute carrier family 26 member 6	slc26a6	3.97188	0.964268	1.69109	1.02344	0.425765	0.00925158
ENSORLG00000021095	ola-mir-192	ola-mir-192	23.8747	12.3335	10.2218	11.9706	0.428144	0.0360373
ENSORLG00000009853	ZPC domain containing protein 5	zpc domain containing protein 5	1.76137	1.22885	0.756869	5.60367	0.429704	0.0311978
ENSORLG00000028995	carbonic anhydrase 7	ca7	9.51584	5.02227	4.10072	5.50924	0.430936	0.00979374
ENSORLG00000005033	solute carrier family 34 member 1	slc34a1	0.698305	1.44697	0.302101	0.580909	0.43262	0.0422887
ENSORLG00000007920	cholesterol 7-alpha-monooxygenase	cyp7a1	15.1583	19.355	6.61646	14.518	0.436491	0.00935226
ENSORLG00000011808	acyl-CoA synthetase long chain family member 5	acsl5	38.7857	36.153	16.9313	29.7133	0.436533	0.00834899
ENSORLG00000019522	fatty acid binding protein 2	fabp2	269.976	243.639	118.037	165.984	0.437214	0.00803624
ENSORLG00000013201	trans-1,2-dihydrobenzene-1,2-diol dehydrogenase	dhdh	10.3639	10.2126	4.56155	7.50241	0.440139	0.0119455
ENSORLG00000008190	sushi domain-containing protein 2	susd2	3.54182	4.27928	1.5607	3.02942	0.440649	0.0133354
ENSORLG00000026113	neuropeptide S receptor 1	npsr1	2.28242	0.677974	1.01257	0.906859	0.443636	0.0491384
ENSORLG00000017079	ATP binding cassette subfamily B member 11	abcb11	9.80924	5.076	4.53322	4.43901	0.462137	0.0117939
ENSORLG00000006212	n/a	n/a	40.487	28.3128	18.8332	20.2181	0.465165	0.0142064
ENSORLG00000016511	solute carrier family 2 member 12	slc2a12	15.2504	3.12158	7.15241	3.82897	0.468998	0.0127692
ENSORLG00000005853	retinol dehydrogenase 8	rdh8	36.4077	22.5683	17.2076	23.061	0.472636	0.0127432
ENSORLG00000009674	glutathione S-transferase alpha 4	gsta4	54.7432	47.4447	25.8832	31.7433	0.472811	0.01219
ENSORLG00000022220	transmembrane protein 14A	tmem14a	55.1586	47.8147	26.0857	31.9891	0.472922	0.0122043
ENSORLG00000004958	methyltransferase like 21C	mettl21c	5.99579	2.58821	2.84306	2.47955	0.474176	0.0338779
ENSORLG00000000917	ectonucleotide pyrophosphatase/phosphodiesterase family member 7	enpp7	59.9127	37.7709	28.5749	31.8595	0.476942	0.0127768
ENSORLG00000022582	hematopoietic SH2 domain-containing protein homolog	hsh2d	2.33991	2.03784	1.12495	1.44049	0.480766	0.0210984
ENSORLG00000019720	glutamyl aminopeptidase	enpep	11.0427	9.79203	5.32547	6.82052	0.482261	0.0147087
ENSORLG00000006019	nuclear receptor subfamily 5 group A member 2	nr5a2	9.77716	7.68202	4.73195	6.88416	0.48398	0.0177378
Up-regulated (WT_DSS / WT)
ENSORLG00000005986	n/a	n/a	0.0338082	0.141575	0.693844	0.510496	20.5229	0.0014726
ENSORLG00000025265	n/a	n/a	0.0325934	0.425313	0.621066	0.5011	19.055	0.00458408
ENSORLG00000029706	n/a	n/a	0.0605247	0.470567	1.15102	1.30963	19.0173	0.00232256
ENSORLG00000022239	n/a	n/a	0.19802	1.42634	1.79725	3.97407	9.07611	0.0147579
ENSORLG00000028475	lysine (K)-specific methyltransferase 2D	kmt2d	0.179054	0.735164	1.47842	1.13192	8.2568	0.00173252
ENSORLG00000027506	mesothelin like	mslnl	0.0479312	0.146798	0.358044	0.261178	7.46996	0.023806
ENSORLG00000004494	n/a	n/a	0.0367906	0.0481954	0.258418	0.156882	7.02402	0.0318787
ENSORLG00000007925	n/a	n/a	0.16777	0.58462	1.14373	0.901577	6.81722	0.00219856
ENSORLG00000024632	L-serine dehydratase/L-threonine deaminase	sds	0.105818	0.0747663	0.663624	0.150612	6.27137	0.0123512
ENSORLG00000018665	n/a	n/a	0.153375	0.866544	0.870899	2.11854	5.67825	0.00408806
ENSORLG00000029865	L-serine dehydratase/L-threonine deaminase-like	sds	0.0916937	0.0534612	0.512549	0.0719736	5.5898	0.0478131
ENSORLG00000003566	n/a	n/a	0.953699	0.245055	5.24332	0.33867	5.49788	0.00254126
ENSORLG00000016772	n/a	n/a	0.0887081	0.219989	0.4809	0.373122	5.42115	0.00609777
ENSORLG00000006961	complement C4	c4b	0.0758381	0.422926	0.389857	0.118299	5.14064	0.00544952
ENSORLG00000024843	leukocyte elastase inhibitor-like	serpinb1	1.11736	1.84353	5.61381	6.84979	5.02419	0.00351226
ENSORLG00000023329	uncharacterized protein K02A2.6-like	uncharacterized protein K02A2.6-like	0.0940606	0.0736749	0.459913	0.0946818	4.88954	0.00752191
ENSORLG00000026663	L-serine dehydratase/L-threonine deaminase	sds	0.22484	0.104132	1.0605	0.189577	4.71668	0.0211272
ENSORLG00000006152	cis-aconitate decarboxylase-like	acod1	0.638805	0.716797	2.97618	2.53713	4.65899	0.00287966
ENSORLG00000030009	n/a	n/a	1.75007	3.44266	8.02824	5.42026	4.58737	0.0043566
ENSORLG00000011491	n/a	n/a	0.845404	2.48033	3.86467	3.78351	4.57139	0.00323636
ENSORLG00000015478	n/a	n/a	0.648861	1.31552	2.86493	1.84323	4.41533	0.00240519
ENSORLG00000027297	n/a	n/a	0.0975519	0.0719606	0.426508	0.091396	4.37211	0.0117174
ENSORLG00000017627	n/a	n/a	0.858209	1.8386	3.71443	3.36059	4.32812	0.00174401
ENSORLG00000011265	n/a	n/a	0.269723	0.606699	1.16604	0.981722	4.32312	0.0318143
ENSORLG00000028388	n/a	n/a	0.367299	0.297696	1.54426	0.264701	4.20435	0.0446402
ENSORLG00000015106	ST8 alpha-N-acetyl-neuraminide alpha-2,8-sialyltransferase 3	st8sia3	0.348469	0.907493	1.42478	1.02374	4.0887	0.0162728
ENSORLG00000012083	sodium channel subunit beta-4	scn4b	0.621589	1.28102	2.51229	2.02156	4.04173	0.0121606
ENSORLG00000026220	n/a	n/a	1.6595	3.27335	6.6583	5.72274	4.01224	0.0026634
ENSORLG00000027507	n/a	n/a	0.714577	2.03295	2.87847	2.86869	4.02822	0.0193218
ENSORLG00000005218	n/a	n/a	0.873412	1.67646	3.4532	4.66601	3.95369	0.00515916
ENSORLG00000017639	toll-like receptor 5	tlr5	0.0910346	0.156398	0.354766	0.317095	3.89704	0.0486698
ENSORLG00000030533	hect domain and RLD 7	herc7	0.308303	0.541406	1.19735	0.830547	3.88368	0.0226906
ENSORLG00000019420	uncharacterized LOC105357479	uncharacterized LOC105357479	0.425947	1.08015	1.65032	1.16834	3.87448	0.00369148
ENSORLG00000008121	galactosylceramide sulfotransferase	gal3st1	2.75114	3.46701	10.471	9.79768	3.80606	0.00257105
ENSORLG00000013499	solute carrier family 13 member 5	slc13a5	1.0119	3.38024	3.77559	3.48856	3.7312	0.00263644
ENSORLG00000025786	n/a	n/a	0.395752	0.954409	1.46979	1.17917	3.71391	0.0102919
ENSORLG00000023425	n/a	n/a	0.715704	1.6971	2.64735	2.35939	3.69895	0.0226273
ENSORLG00000028464	n/a	n/a	0.751955	2.10992	2.77241	2.23047	3.68694	0.0365687
ENSORLG00000006186	probable alpha-ketoglutarate-dependent hypophosphite dioxygenase	alkbh6	5.26775	2.44457	19.0964	12.5262	3.62514	0.00220948
ENSORLG00000020849	neuropilin-2	nrp2	1.03711	3.02742	3.74173	3.49392	3.60784	0.0029747
ENSORLG00000020055	n/a	n/a	0.611554	1.06778	2.21336	3.69018	3.61925	0.0251109
ENSORLG00000025041	n/a	n/a	0.446208	1.57968	1.59995	1.54867	3.58566	0.00632736
ENSORLG00000029522	n/a	n/a	2.09398	4.28663	7.2061	6.00337	3.44135	0.00366029
ENSORLG00000029467	n/a	n/a	0.479253	1.28296	1.64083	2.24775	3.42373	0.0131161
ENSORLG00000022172	ring finger protein 213	rnf213	0.318725	0.495961	1.08744	1.05779	3.41184	0.00492386
ENSORLG00000006169	si:ch211-153b23.4	si:ch211-153b23.4	1.29021	0.825937	4.3707	2.97702	3.38759	0.00409831
ENSORLG00000008732	nuclear receptor subfamily 4 group A member 3	nr4a3	1.55815	1.95132	5.25174	2.24472	3.37051	0.00345478
ENSORLG00000022843	arachidonate 8S-lipoxygenase-like	alox8	0.516021	1.69534	1.73943	8.52013	3.37084	0.0169463
ENSORLG00000011971	n/a	n/a	0.19319	0.634726	0.643537	0.717368	3.33111	0.0393317
ENSORLG00000009311	terminal nucleotidyltransferase 5D	tent5d	0.475847	0.802757	1.57522	1.14829	3.31036	0.0244936
*1 Fragment per kilobase of exon length per million reads
*2 Fold change and p_value in WT_DSS compared to WT
